# Supplementary material for: Synergetic Effect of Hybrid Conductive Additives for High-Capacity and Excellent Cyclability in Si Anodes
Source: MDPI journal article supplement (doi:10.3390/nano12193354), 2022-09-26
Supplement: s1 [file s1]

Supporting Information

# Synergetic Effect of Hybrid Conductive Additives for High-Capacity and Excellent Cyclability in Si Anodes

Byeong-Il Yoo<sup>1,2</sup>, Han-Min Kim<sup>1,2</sup>, Min-Jae Choi<sup>2,\*</sup>, Jung-Keun Yoo<sup>1,3,\*</sup>

<sup>1</sup> Carbon Composites Department, Composites Research Division, Korea Institute of Materials Science (KIMS), Changwon 51508, Republic of Korea

<sup>2</sup> Department of Chemical and Biochemical Engineering, Dongguk University, Seoul 04620, Republic of Korea

<sup>3</sup> Advanced Materials Engineering Division, University of Science and Technology (UST), Daejeon, 34113, Republic of Korea

\* Correspondence: minjae.choi@dgu.ac.kr (M.-J.C.) yoojk@kims.re.kr (J.-K.Y.)

**Table.S1.** EIS fitting values in Figure 3a.

| EIS [ $\Omega \cdot \text{cm}$ ] | CB1   | Hybrid1 | Hybrid2 | SW0.05 |
|----------------------------------|-------|---------|---------|--------|
| $R_s$                            | 1.92  | 1.74    | 1.99    | 1.84   |
| $R_{ct}$                         | 65.96 | 44.06   | 47.84   | 53.53  |

**Figure.S1**

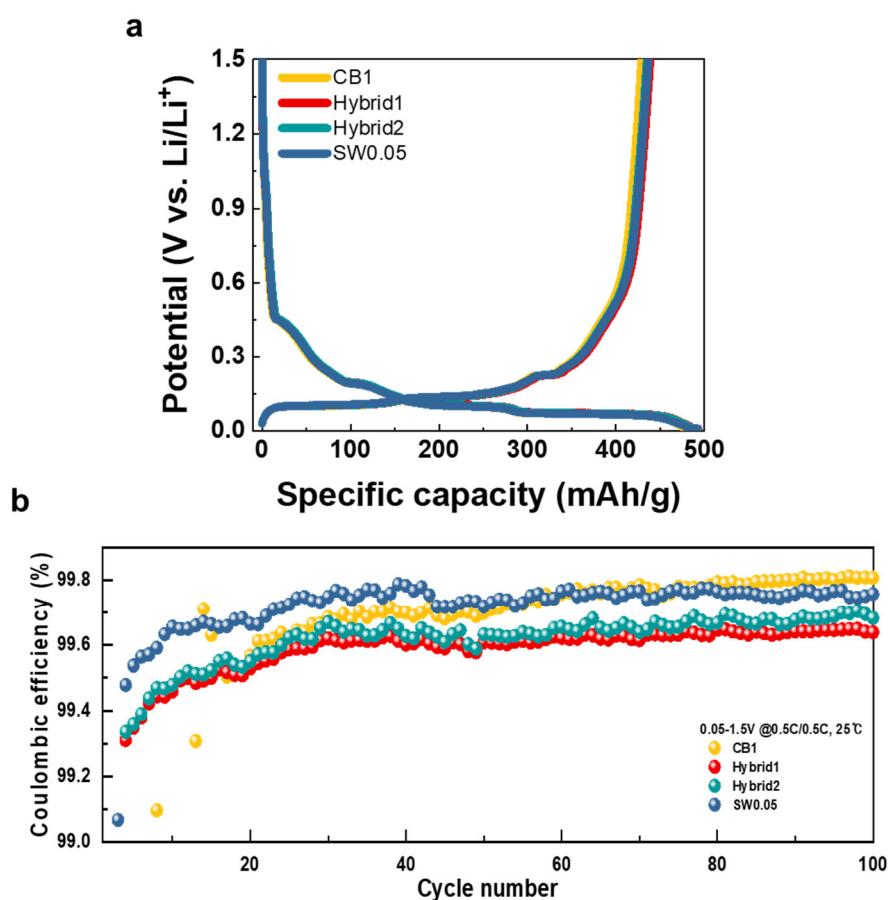

**Figure.S1.** Comparison of (a) 1<sup>st</sup> charge/discharge profiles (b) coulombic efficiency of the 4 samples half-cell.

Figure.S2

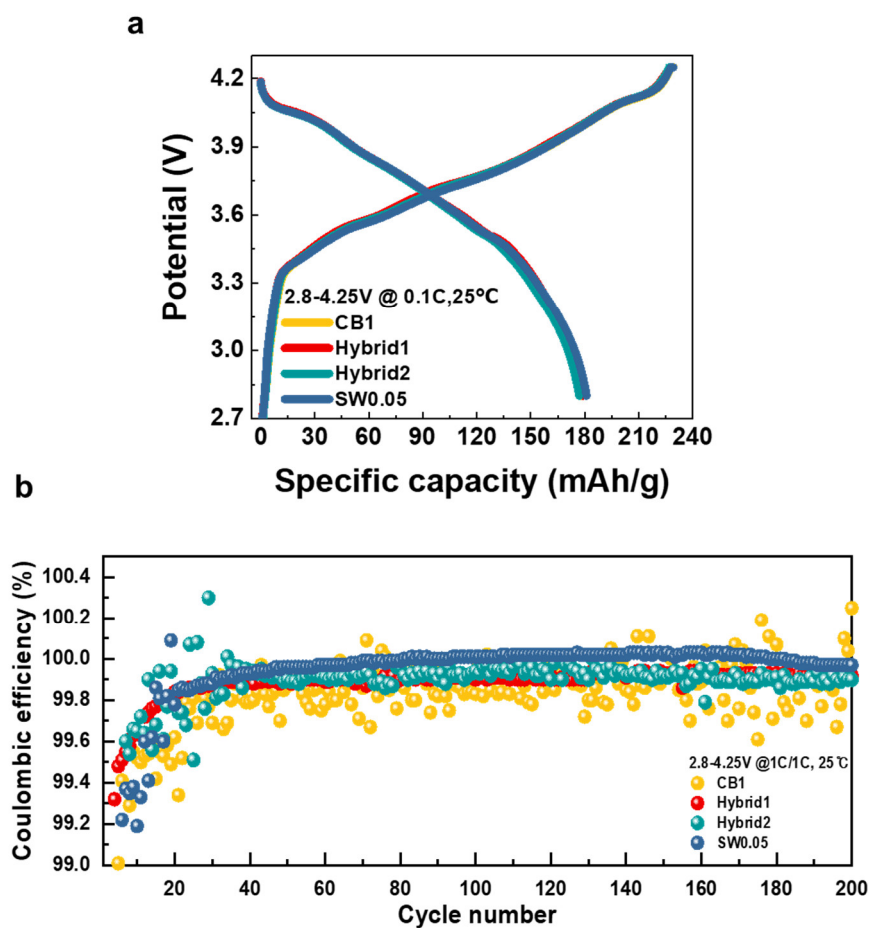

**Figure.S2.** Comparison of (a) 1<sup>st</sup> charge/discharge profiles (b) coulombic efficiency of the 4 samples full-cell.

**Table.S2.** Initial coulombic efficiency values in Figure 3c and Figure 4a.

|                                    |           | CB1   | Hybrid1 | Hybrid2 | SW0.05 |
|------------------------------------|-----------|-------|---------|---------|--------|
| Initial Coulombic Efficiency [ICE] | Half-cell | 88.71 | 88.92   | 88.37   | 88.60  |
|                                    | Full-cell | 78.35 | 78.92   | 77.46   | 77.55  |

Figure.S3

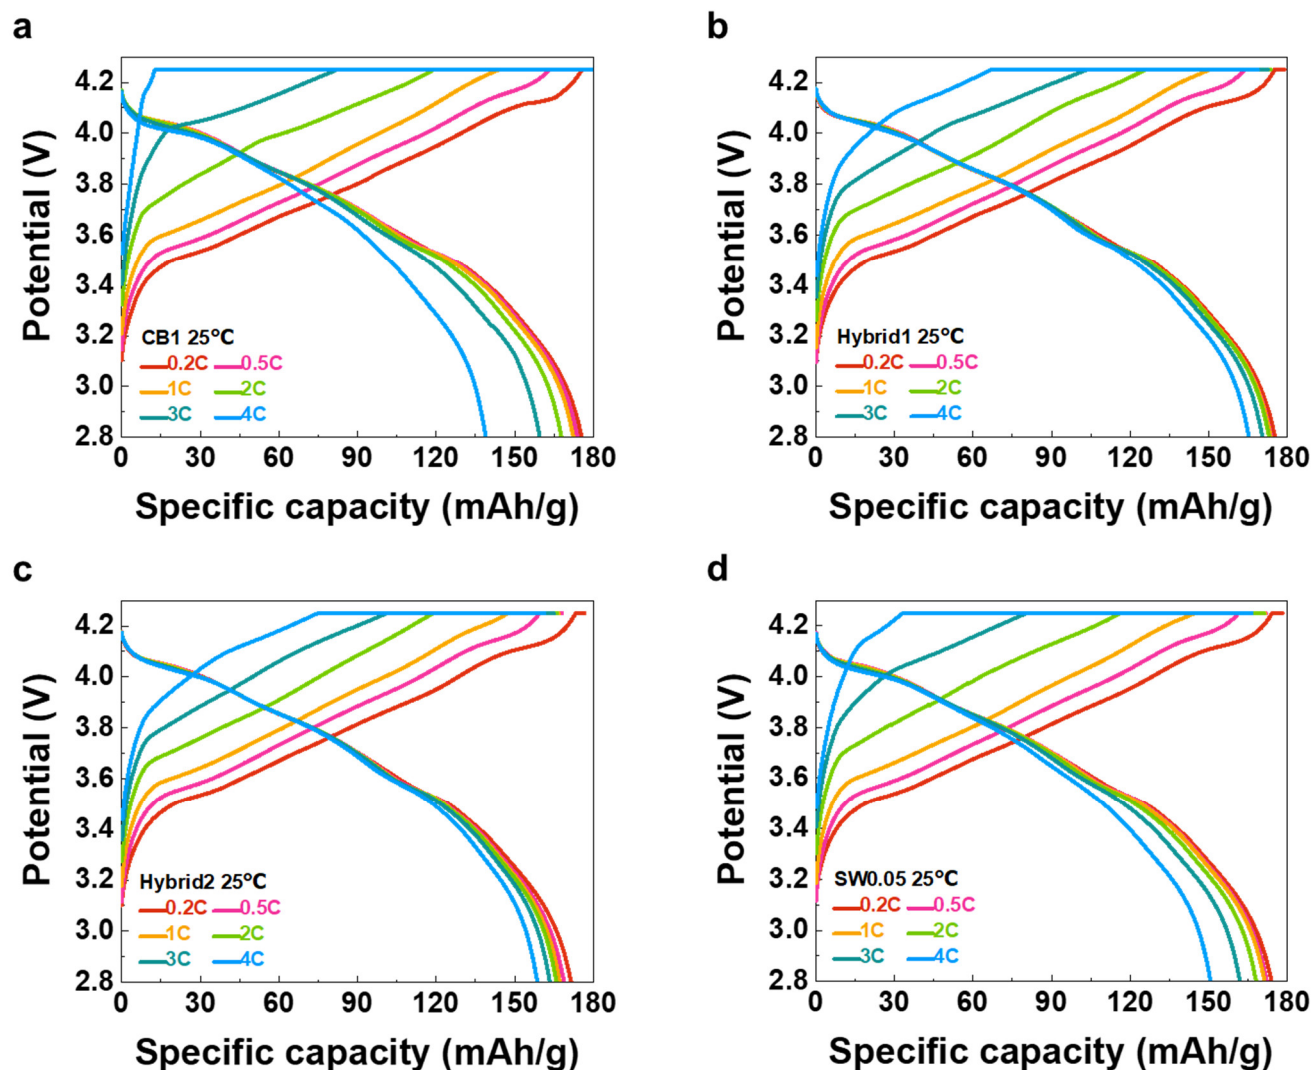

Figure.S3. Charge/discharge curves at various current density of (a) CB1 (b) Hybrid1 (c) Hybrid2 (d) SW0.05.

Figure.S4

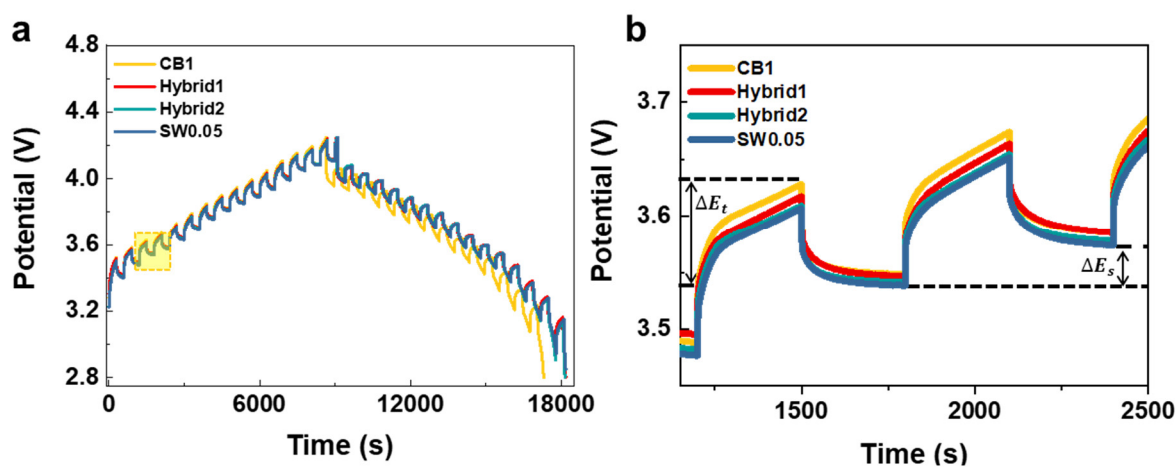

Figure.S4. (a) GITT curves for 4 samples. (b) Detailed GITT curves from 1200 to 2400 second at 0.5C.

**Table.S3.** Detailed values of Li ion diffusion coefficient.

|                                    | CB1     | Hybrid1 | Hybrid2 | SW0.05  |
|------------------------------------|---------|---------|---------|---------|
| $D_{Li^+}$<br>[cm <sup>2</sup> /s] | 1.43E-8 | 1.71E-8 | 1.39E-8 | 1.25E-8 |

**Figure.S5**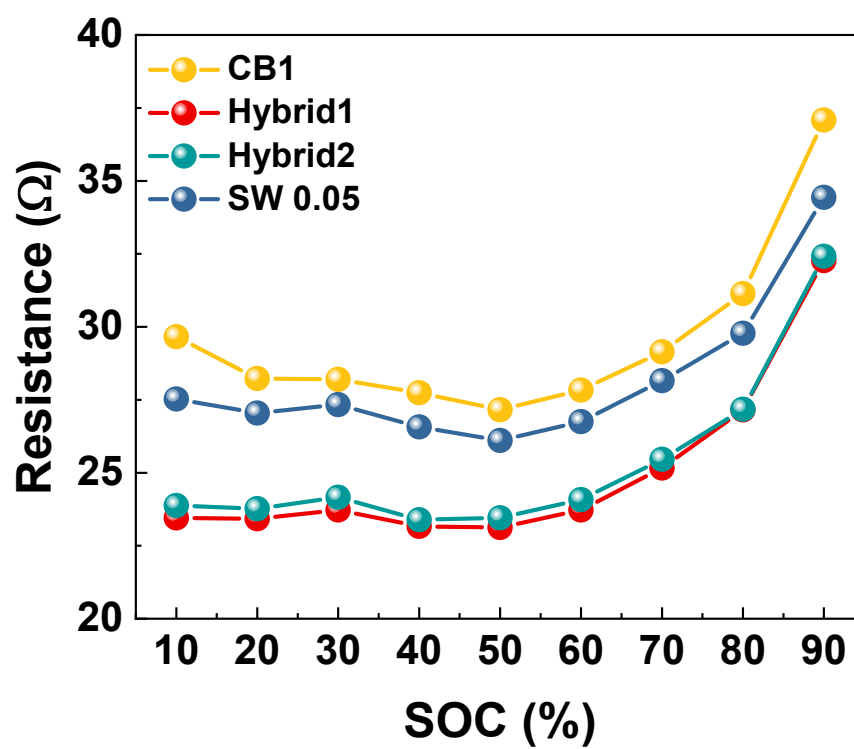**Figure.S5.** Resistance vs SOC profiles during the charge.**Table.S4.** Detailed values at various SOC.

| IR<br>[Ω]  | CB1   | Hybrid1 | Hybrid2 | SW0.05 |
|------------|-------|---------|---------|--------|
| @ SOC 10 % | 29.66 | 23.45   | 23.88   | 27.52  |
| @ SOC 50 % | 27.16 | 23.12   | 23.46   | 26.11  |
| @ SOC 90 % | 37.09 | 32.27   | 32.41   | 34.43  |
